# Supplementary material
Source: PubMed Central journal article supplement (PMC2992086)
Supplement: NIHMS241371-supplement-supplemental_data.pdf [file NIHMS241371-supplement-supplemental_data.pdf]

## Electronic Supplementary Information

### **Mutanobactin A from the human oral pathogen *Streptococcus mutans* is a cross-kingdom regulator of the yeast-mycelium transition**

P. Matthew Joyner,<sup>a</sup> Jinman Liu,<sup>b</sup> Zhijun Zhang,<sup>b</sup> Justin Merritt,<sup>b</sup> Fengxia Qi,<sup>b</sup> and Robert H. Cichewicz<sup>\*,a,c</sup>

<sup>a</sup>*Natural Products Discovery Group, Department of Chemistry and Biochemistry, Stephenson Life Sciences Research Center, 101 Stephenson Parkway, University of Oklahoma, Norman, OK 73019 U.S.A.*

<sup>b</sup>*College of Dentistry, 975 NE 10<sup>th</sup> Street, The University of Oklahoma Health Sciences Center, Oklahoma City, OK 73014 U.S.A.*

<sup>c</sup>*Graduate Program in Ecology and Evolutionary Biology, University of Oklahoma, Norman, OK, USA 73019 U.S.A.*

\*To whom correspondence should be addressed. Tel: +1 (405) 325-6969. E-mail:  
rhcichewicz@ou.edu.

## Contents

- **General experimental procedures**
- **Preparation and extraction of bacterial culture**
- **Mutanobactin A (1) chemical and physical data**
- **Table S1  $^1\text{H}$  and  $^{13}\text{C}$  NMR data for mutanobactin A (1)**
- **Fig. S1 HRESIMS (FT-ICR) data for mutanobactin A (1)**
- **Fig. S2 ESI MS/MS data for mutanobactin A (1)**
- **Fig. S3  $^1\text{H}$  NMR spectrum for mutanobactin A (1)**
- **Fig. S4  $^{13}\text{C}$  NMR spectrum for mutanobactin A (1)**
- **Fig. S5  $^1\text{H}$ - $^1\text{H}$  COSY NMR spectrum for mutanobactin A (1)**
- **Fig. S6  $^1\text{H}$ - $^{13}\text{C}$  HSQC NMR spectrum for mutanobactin A (1)**
- **Fig. S7  $^1\text{H}$ - $^{13}\text{C}$  HMBC NMR spectrum for mutanobactin A (1)**
- **Fig. S8  $^1\text{H}$ - $^1\text{H}$  NOESY NMR spectrum for mutanobactin A (1)**
- **Fig. S9  $^1\text{H}$ - $^{15}\text{N}$  HMBC NMR spectrum for mutanobactin A (1)**
- **Fig. S10 1D  $^1\text{H}$ - $^1\text{H}$  TOCSY NMR spectra for mutanobactin A (1)**

**General Experimental Procedures.** NMR data were obtained on a Varian VNMR spectrometer (500 MHz for  $^1\text{H}$ , 125 MHz for  $^{13}\text{C}$ ) with a triple resonance probe at  $22 \pm 0.5$  °C. Electrospray-ionization mass spectrometry data were collected on an IonSpec (Varian, Inc.) 9.4 T FT-ICR instrument. ESI MS/MS analyses were performed on a LCT premier (Waters Corp.) time-of-flight instrument. Flash chromatography was performed on a Biotage Isolera One using a 100 g  $\text{C}_{18}$  column with a flow rate of 50 mL/min. HPLC separations were carried out on a Shimadzu system using a SCL-10A VP controller and Gemini  $5\mu\text{m}$   $\text{C}_{18}$  column (110Å, 250 x 21.2 mm) with a flow rate of 10 mL/min. All solvents were of ACS grade or better. Optical rotation measurement were performed on a Rudolph Research Autopol III automatic polarimeter;  $[\alpha]_{\text{D}}$  values are given in  $\text{deg}\cdot\text{cm}^2\cdot\text{g}^{-1}$ .

**Preparation and extraction of bacterial culture.** A culture of *Streptococcus mutans* UA159 was prepared by inoculating 15 L of brain-heart infusion (BHI) broth with 100 mL of a stationary phase *S. mutans* UA159 culture. The culture was incubated under microaerobic conditions at 37 °C for 36 h. The culture was extracted three times with equal volumes of ethyl acetate, which was then evaporated *in vacuo* to generate the *S. mutans* UA159 extract.

**Mutanobactin A (1):** white solid;  $[\alpha]_{\text{D}}^{25} = -8.0$  (*c* 0.001 in MeOH);  $\lambda_{\text{max}}$  (MeOH) 221 nm ( $\epsilon/\text{dm}^3 \text{mol}^{-1} \text{cm}^{-1}$  38 900);  $^1\text{H}$ ,  $^{13}\text{C}$ , and  $^{15}\text{N}$  NMR data, see Table S1; HRESIMS (FT-ICR)  $m/z$   $[\text{M-H}]^-$  719.41713 (calcd. for  $\text{C}_{36}\text{H}_{59}\text{N}_6\text{O}_7\text{S}$ , 719.41714).

**Table S1** NMR Spectroscopic Data (DMSO-*d*<sub>6</sub>, 500 MHz for <sup>1</sup>H, 125 MHz for <sup>13</sup>C) for mutanobactin A (**1**)

| position | $\delta_C$ , mult. <sup>a</sup> | $\delta_H$ (J in Hz)        | $\delta_N$ <sup>b</sup> |
|----------|---------------------------------|-----------------------------|-------------------------|
| 1        | 50.4, CH                        | 4.43, ddd (3.7, 9.0, 11.0)  |                         |
| 2a       | 40.4, CH <sub>2</sub>           | 1.44, m                     |                         |
| 2b       |                                 | 1.81, ddd (3.9, 10.5, 13.8) |                         |
| 3        | 24.2, CH                        | 1.59, m                     |                         |
| 4        | 20.9, CH <sub>3</sub>           | 0.82, d (6.6)               |                         |
| 5        | 23.5, CH <sub>3</sub>           | 0.92, d (6.7)               |                         |
| 6        | 170.5, C                        |                             |                         |
| 7        | 48.0, CH                        | 4.52, quintet (6.8)         |                         |
| 8        | 17.7, CH <sub>3</sub>           | 1.17, d (6.7)               |                         |
| 9        | 169.7, C                        |                             |                         |
| 10       | 61.0, CH                        | 4.12, dd (3.7, 8.9)         |                         |
| 11a      | 29.6, CH <sub>2</sub>           | 1.72, m                     |                         |
| 11b      |                                 | 2.13, m                     |                         |
| 12       | 24.5, CH <sub>2</sub>           | 1.90, m                     |                         |
| 13a      | 46.8, CH <sub>2</sub>           | 3.43, m                     |                         |
| 13b      |                                 | 3.65, ddd (4.5, 7.5, 9.8)   |                         |
| 14       | 171.6, C                        |                             |                         |
| 15       | 58.8, CH                        | 3.57, dd (8.3, 10.0)        |                         |
| 16       | 26.2, CH                        | 2.33, m                     |                         |
| 17       | 20.4, CH <sub>3</sub>           | 0.84, d (6.6)               |                         |
| 18       | 18.8, CH <sub>3</sub>           | 0.77, d (6.8)               |                         |
| 19       | 168.8, C                        |                             |                         |
| 20       | 52.2, CH                        | 4.87 ddd (2.6, 8.0, 9.0)    |                         |
| 21a      | 28.5, CH <sub>2</sub>           | 2.23, dd (2.6, 16.0)        |                         |
| 21b      |                                 | 3.19, dd (9.0, 16.0)        |                         |
| 22       | 170.4, C                        |                             |                         |
| 23a      | 43.7, CH <sub>2</sub>           | 2.79, m                     |                         |
| 23b      |                                 | 3.28, m                     |                         |
| 24       | 41.0, CH                        | 3.25, m                     |                         |
| 25       | 61.7, CH                        | 3.87, d (9.8)               |                         |
| 26       | 167.7, C                        |                             |                         |
| 27       | 203.8, C                        |                             |                         |
| 28a      | 41.4, CH <sub>2</sub>           | 2.33, m                     |                         |
| 28b      |                                 | 2.44, dd (6.0, 16.6)        |                         |
| 29       | 23.1, CH <sub>2</sub>           | 1.44, m                     |                         |
| 30       | 28.7, CH <sub>2</sub>           | 1.20, m                     |                         |
| 31       | 22.1, CH <sub>2</sub>           | 1.25, m                     |                         |
| 32       | 28.8, CH <sub>2</sub>           | 1.23, m                     |                         |
| 33       | 22.1, CH <sub>2</sub>           | 1.25, m                     |                         |
| 34       | 31.3, CH <sub>2</sub>           | 1.23, m                     |                         |
| 35       | 28.9, CH <sub>2</sub>           | 1.27, m                     |                         |
| 36       | 14.0, CH <sub>3</sub>           | 0.85, t (6.8)               |                         |
| C1-NH    |                                 | 8.59, d (9.0)               | 120.0                   |
| C7-NH    |                                 | 7.77, d (6.5)               | 112.0                   |
| C10-NH   |                                 |                             | nd <sup>c</sup>         |
| C15-NH   |                                 | 8.05, d (8.5)               | 107.5                   |
| C20-NH   |                                 | 7.23, d (8.0)               | 116.0                   |
| C23-NH   |                                 | 7.90, dd (5.3, 9.0)         | 105.5                   |

<sup>a</sup>Determined by HSQC experiment at 500 MHz.

<sup>b</sup>Determined by HMBC experiment at 500 MHz.

<sup>c</sup> nd: not detected

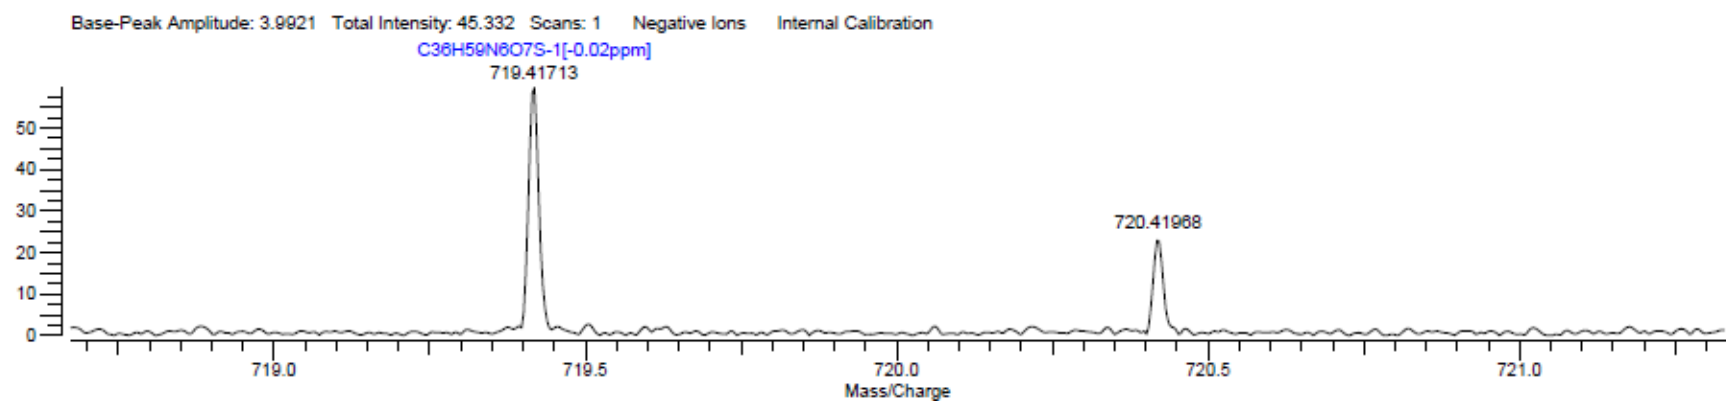

**Fig. S1** HRESIMS (FT-ICR) data for mutanobactin A (**1**)

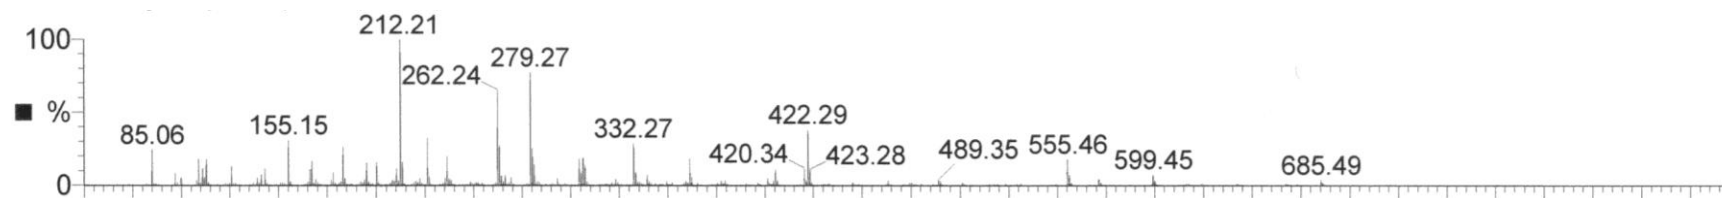

**Fig. S2** ESI MS/MS data for mutanobactin A (1)

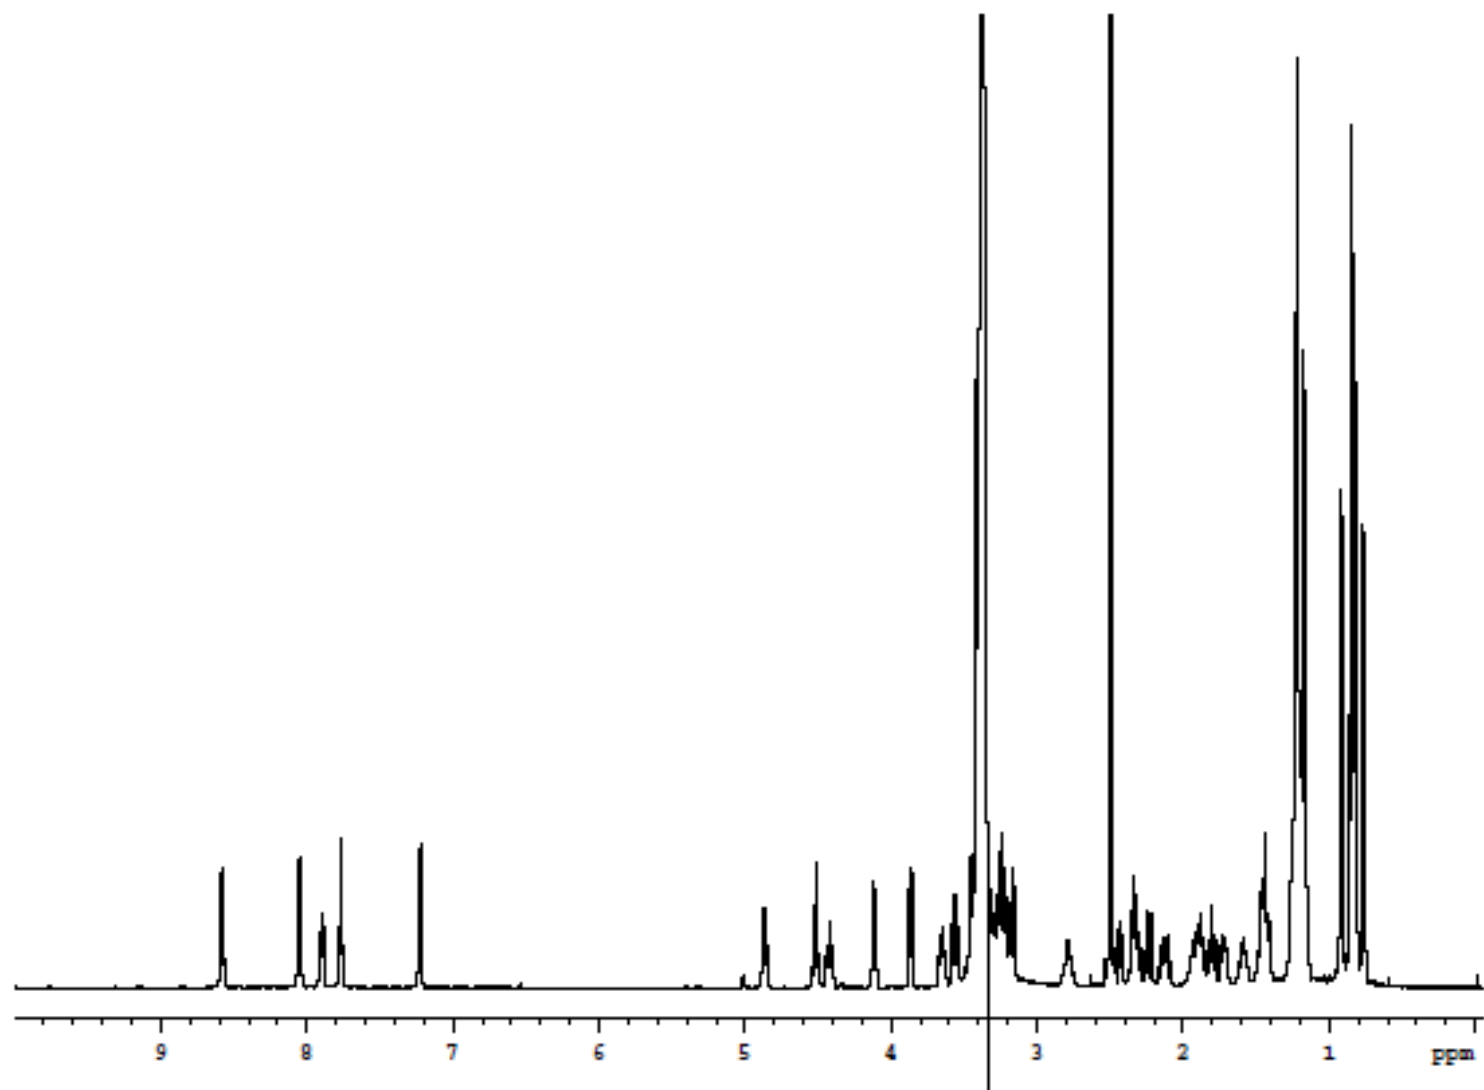

**Fig. S3**  $^1\text{H}$  NMR spectrum for mutanobactin A (1)

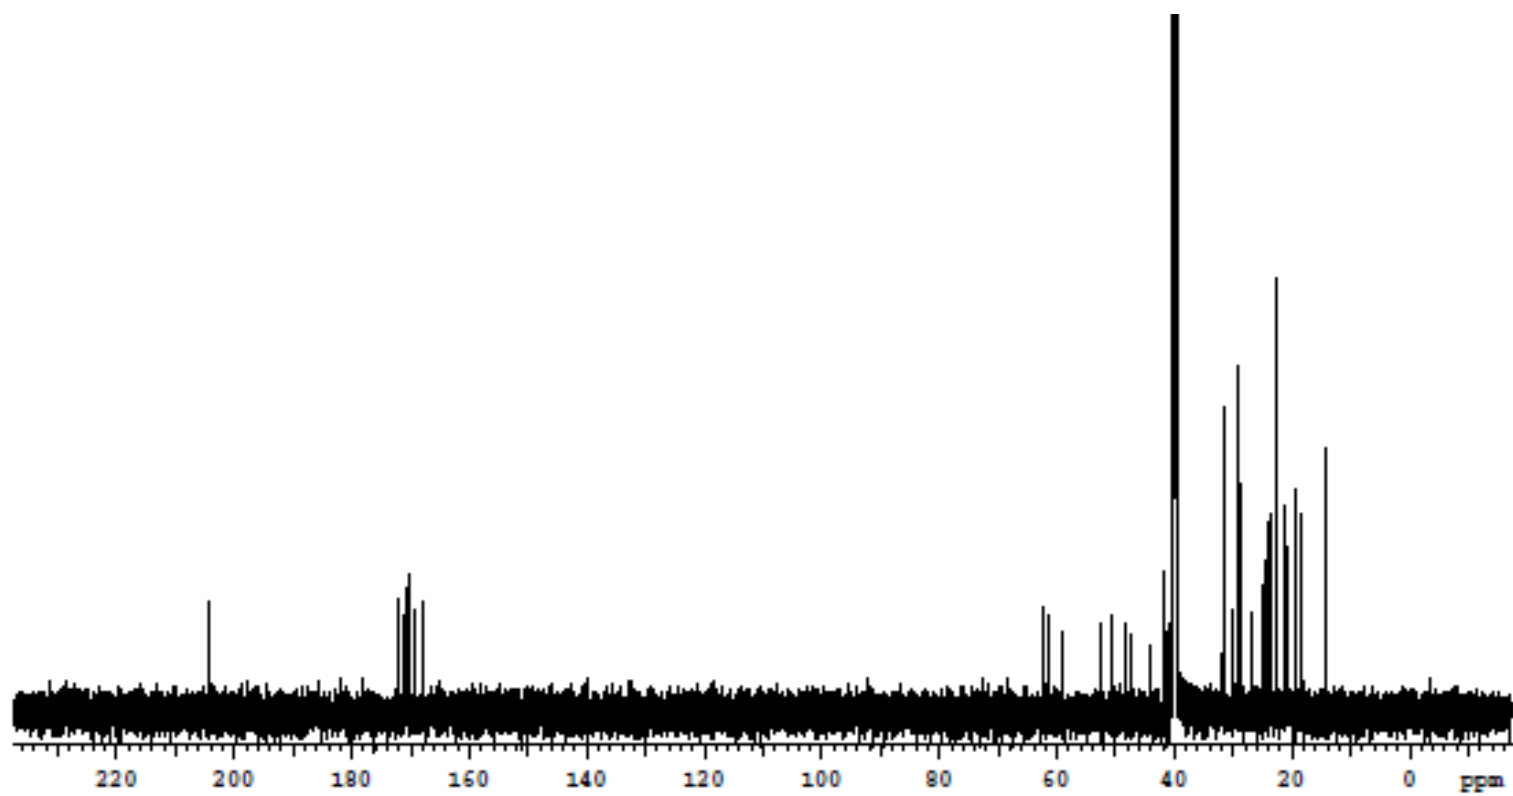

**Fig. S4**  $^{13}\text{C}$  NMR spectrum for mutanobactin A (**1**)



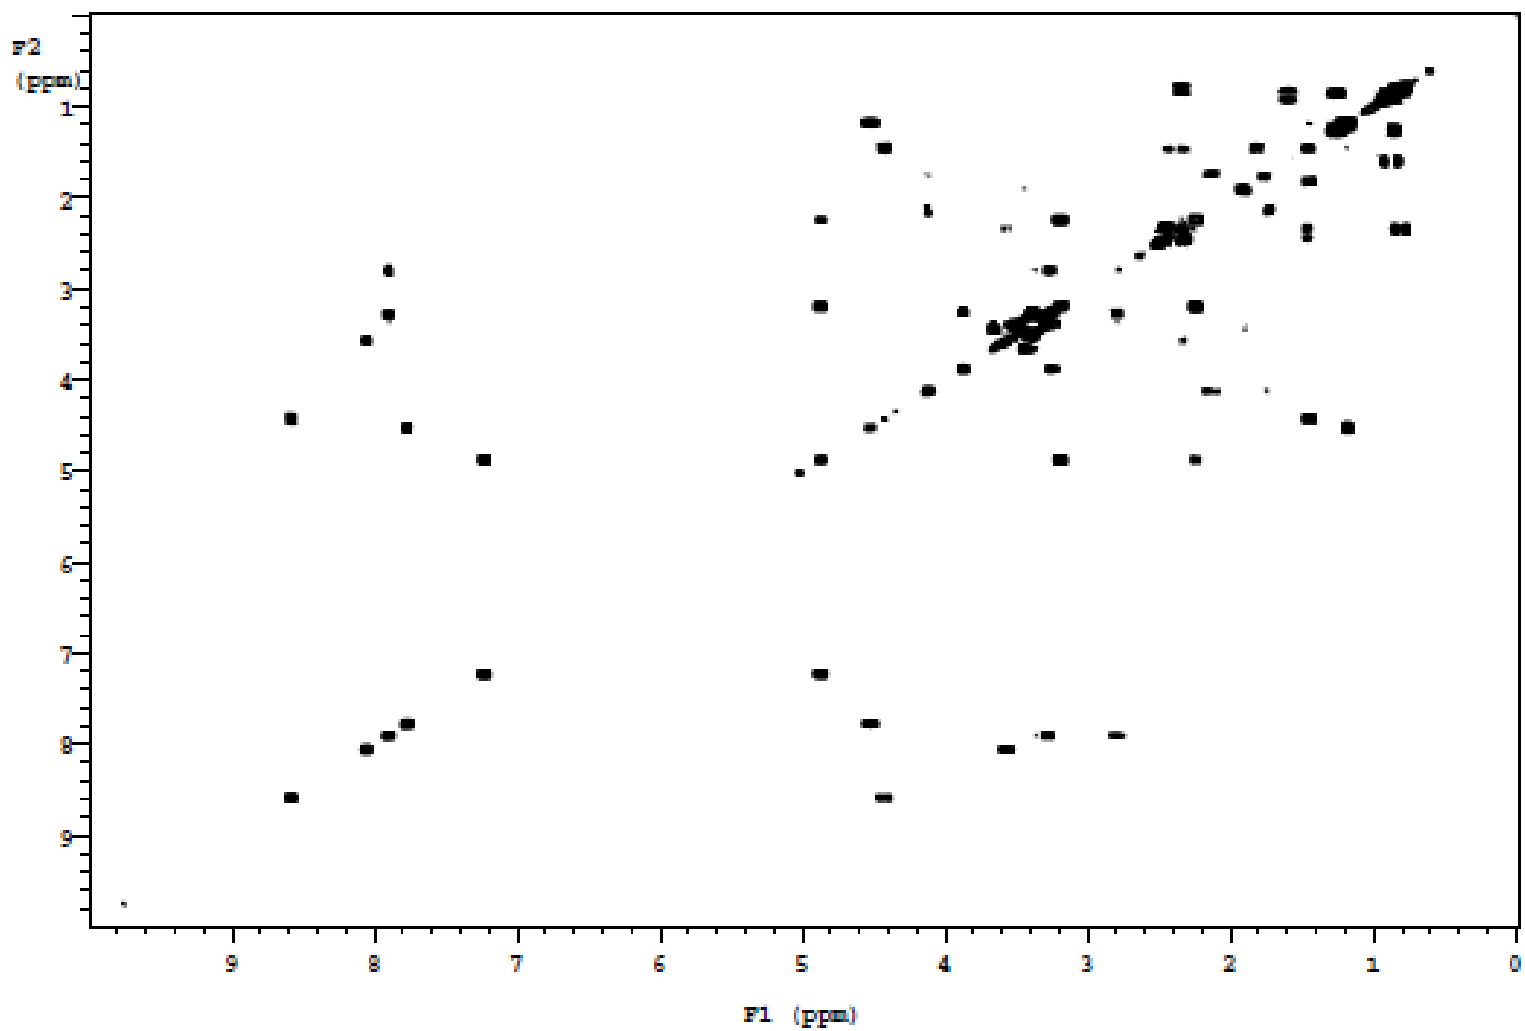

Fig. S5 <sup>1</sup>H-<sup>1</sup>H COSY NMR spectrum for mutanobactin A (1)

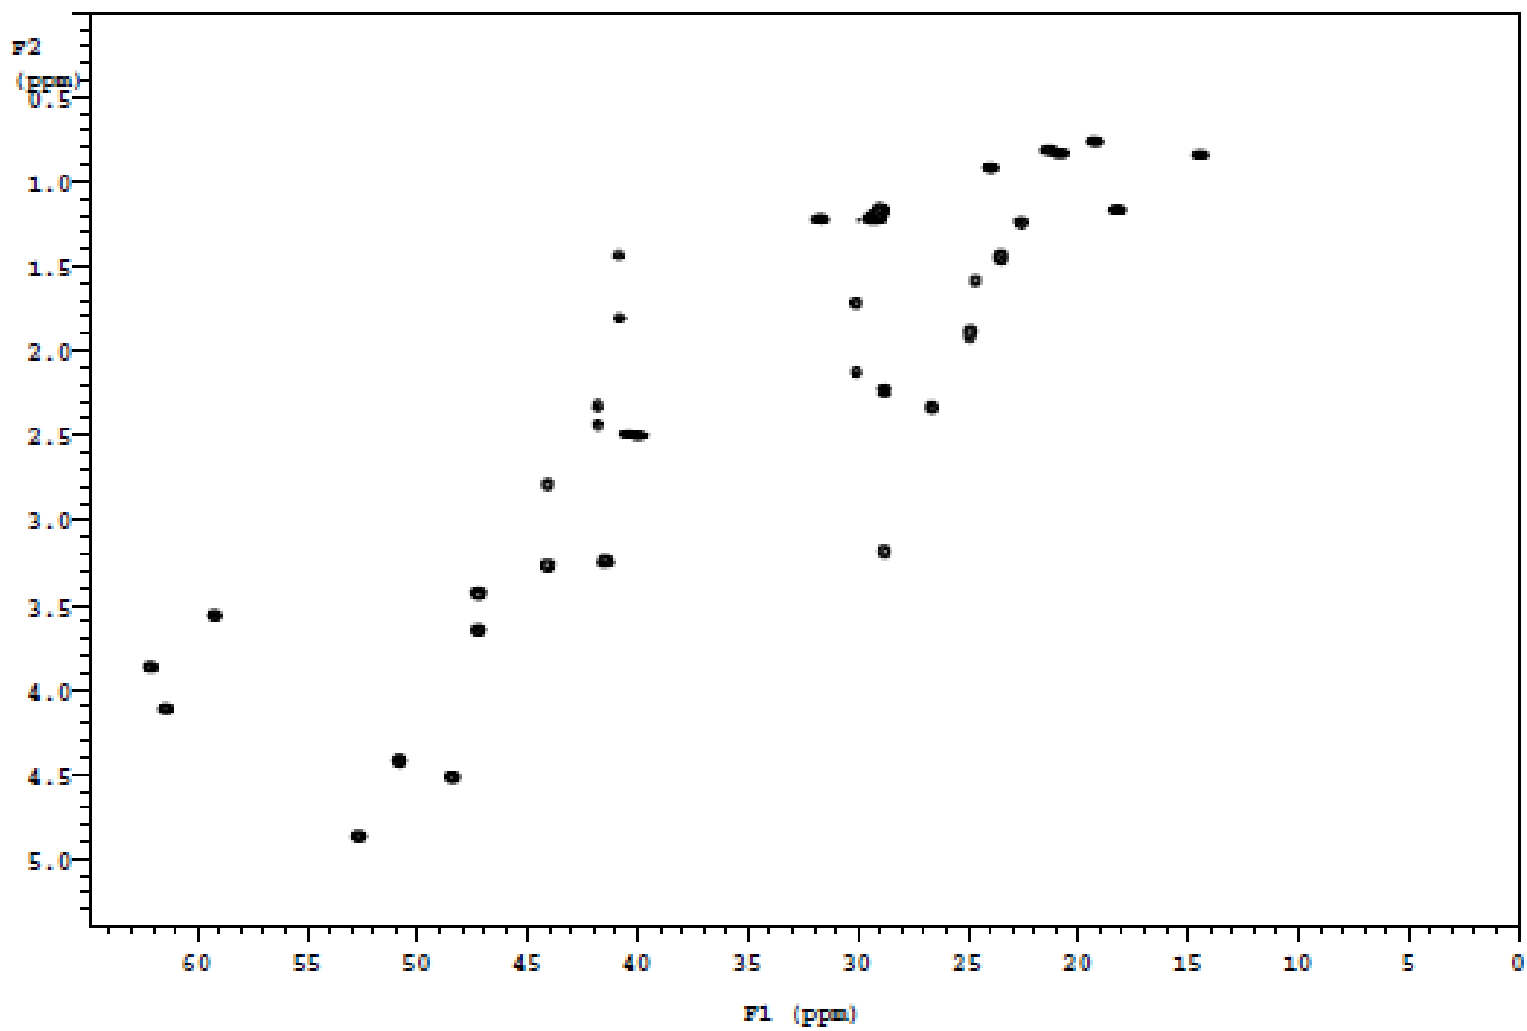

**Fig. S6** <sup>1</sup>H-<sup>13</sup>C HSQC NMR spectrum for mutanobactin A (**1**)

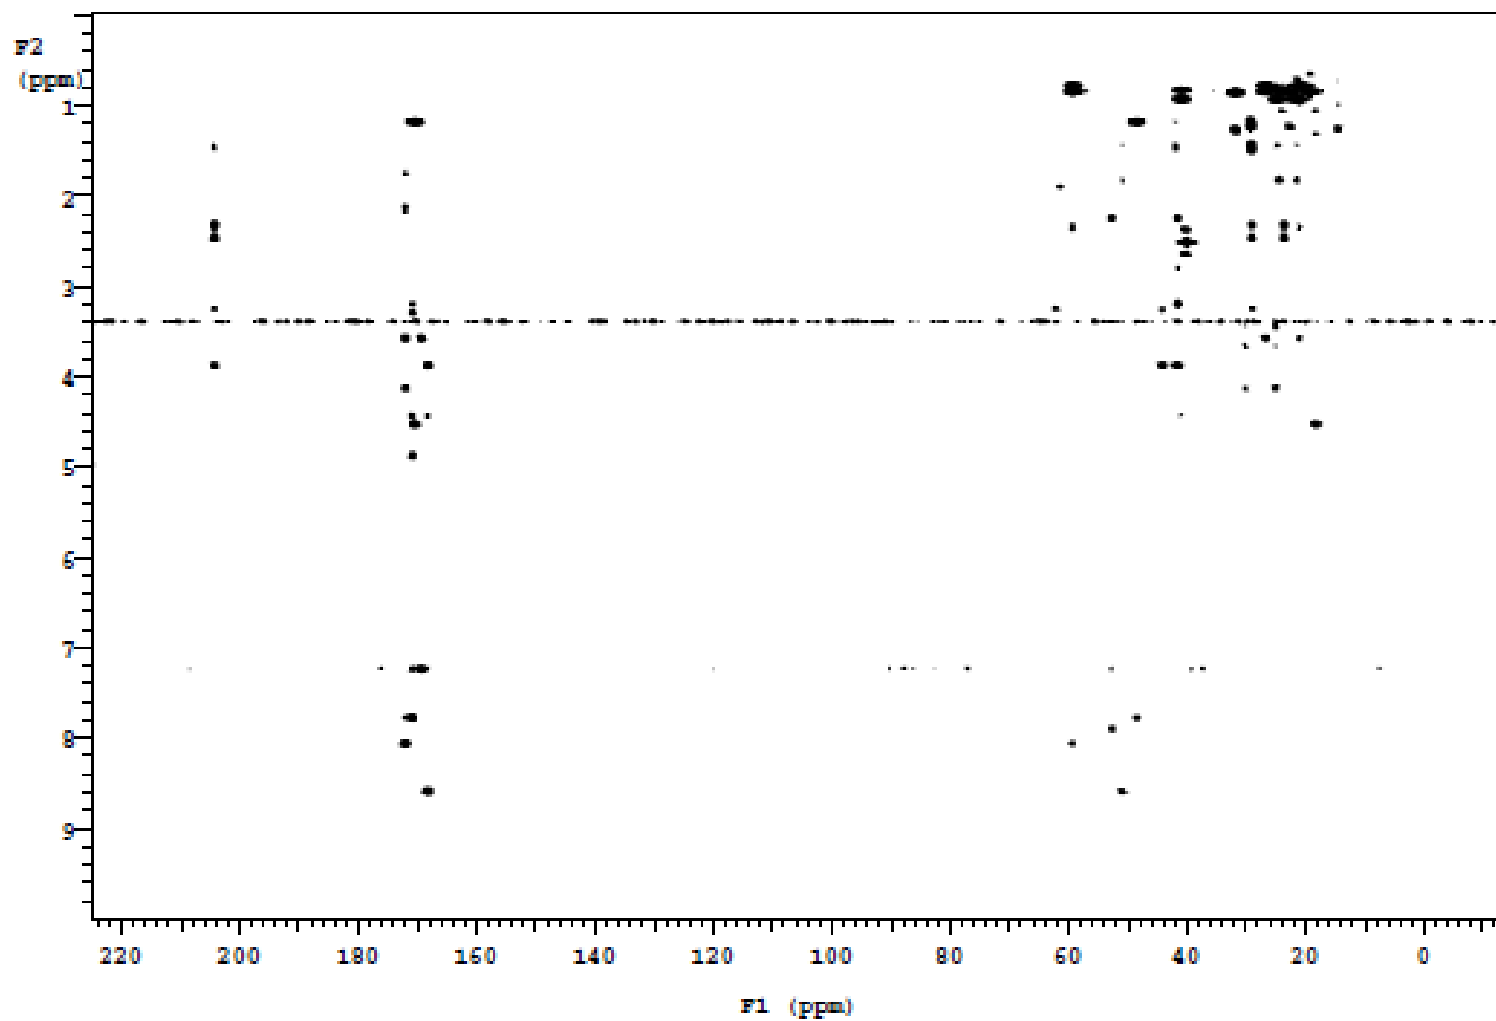

**Fig. S7**  $^1\text{H}$ - $^{13}\text{C}$  HMBC NMR spectrum for mutanobactin A (**1**)

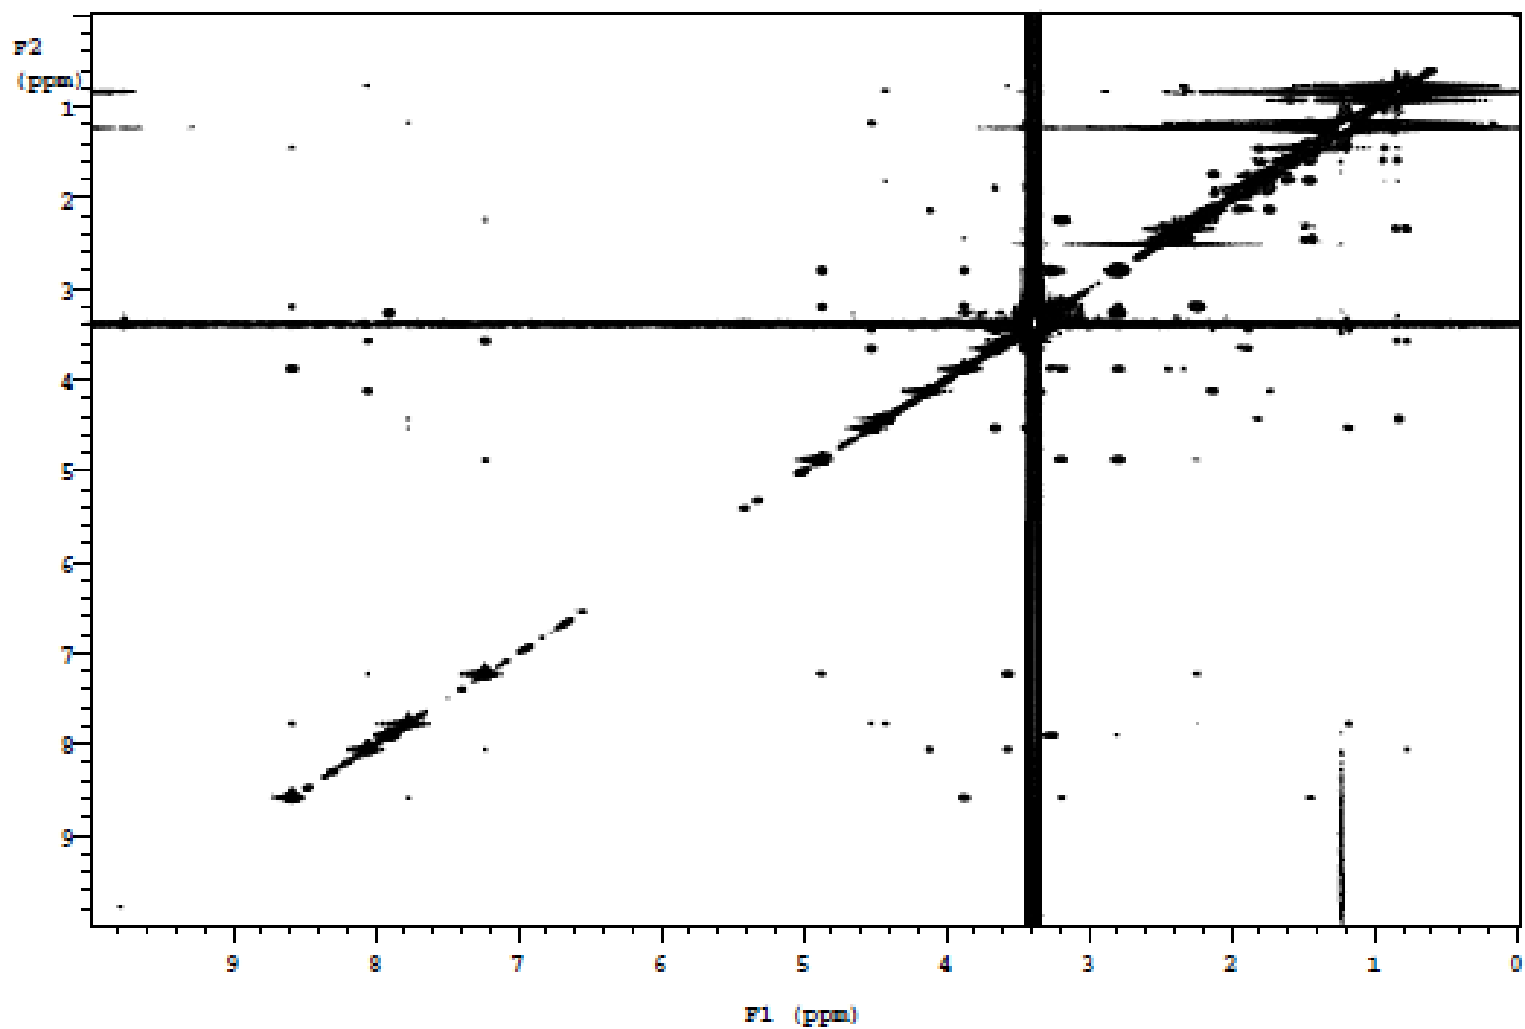

**Fig. S8**  $^1\text{H}$ - $^1\text{H}$  NOESY NMR spectrum for mutanobactin A (**1**)

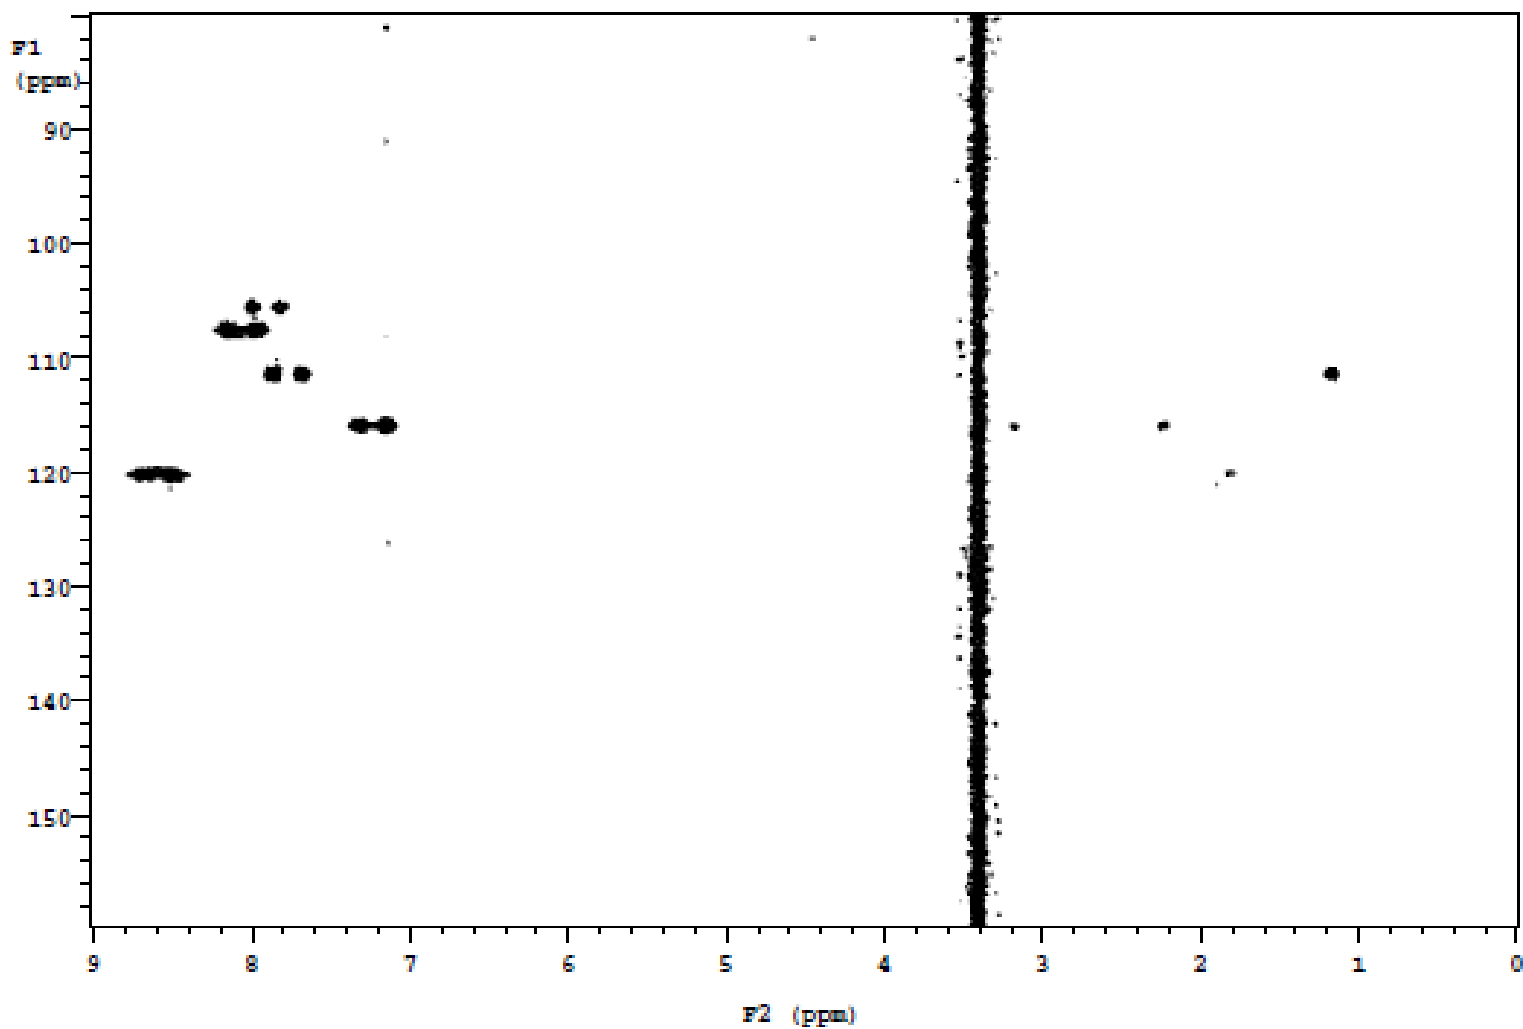

**Fig. S9**  $^1\text{H}$ - $^{15}\text{N}$  HMBC NMR spectrum for mutanobactin A (**1**)

28MAY2008 in DMSO-d6 6/8/10

Selective band center. 4.86 (ppm), width. 30.6 (Hz)  
Selective band center. 4.51 (ppm), width. 31.7 (Hz)  
Selective band center. 4.42 (ppm), width. 32.8 (Hz)  
Selective band center. 4.11 (ppm), width. 36.0 (Hz)  
Selective band center. 3.86 (ppm), width. 28.3 (Hz)

File: hmg/rb2/ncprp/data/2/12/ncprp/28m108\_14.tocsv.dms.500mhz.000310.prd.fid

Pulse Sequence: TOCSY1D

Temp. 22.0 C / 295.1 K  
Operator: rbc

Relax. delay 1.000 sec  
Pulse 90.0 degree  
Acq. time 2.045 sec  
Width 5020.1 Hz

64 repetitions  
OBSRVR El, 499.8792453 MHz  
DATA PROCESSING  
Line broadening 2.0 Hz  
FT size 32768  
Total time 18 min

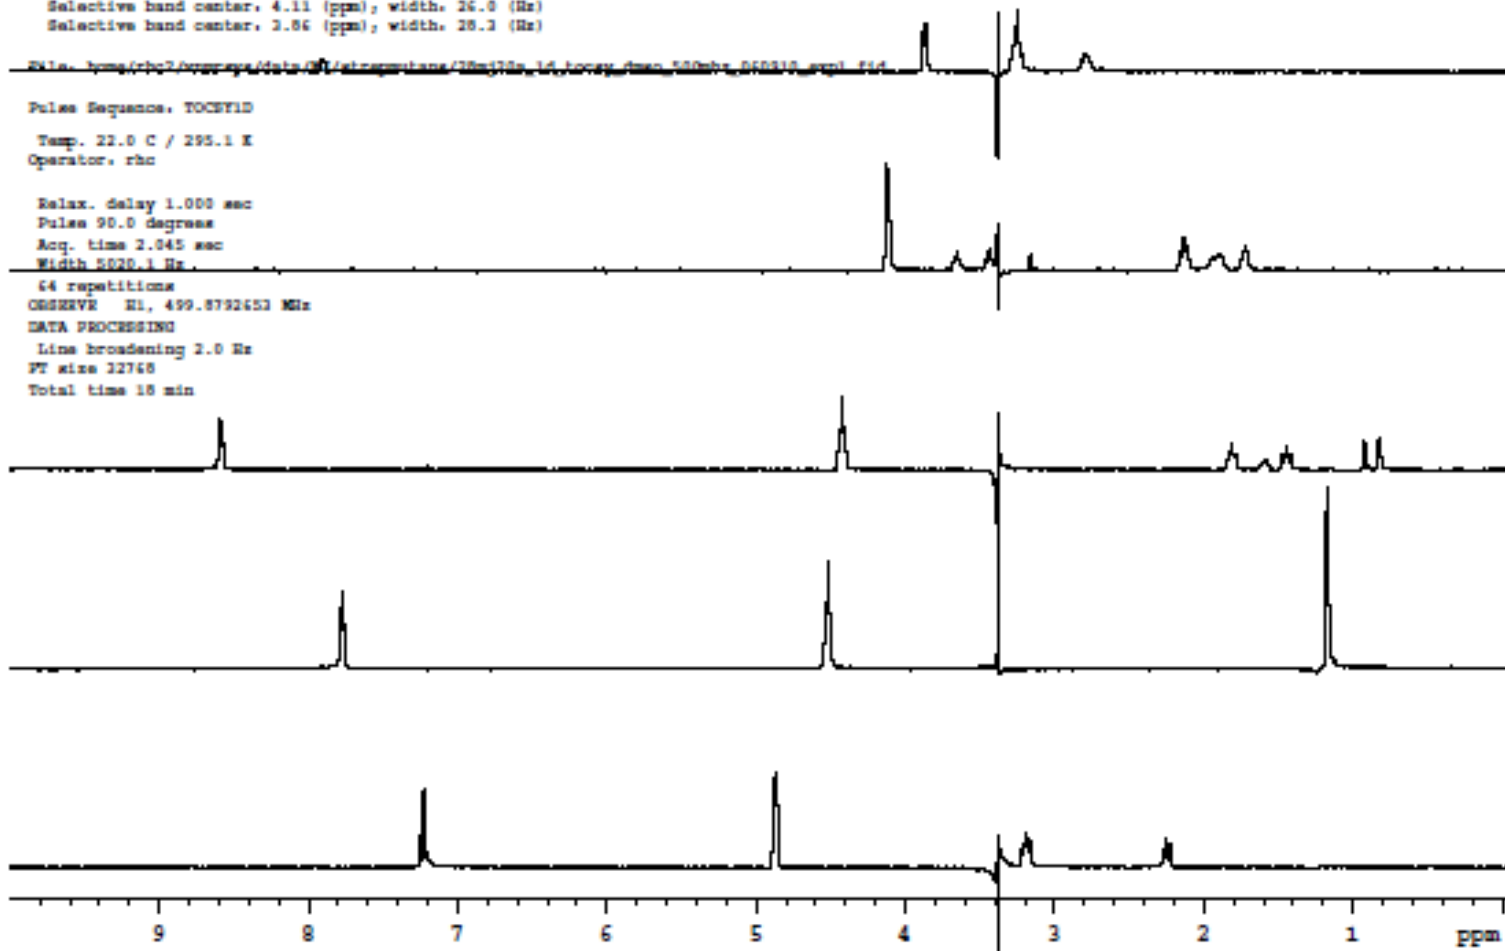

Fig. S10 1D  $^1\text{H}$ - $^1\text{H}$  TOCSY NMR spectra for mutanobactin A (**1**) (panel 1 of 3)

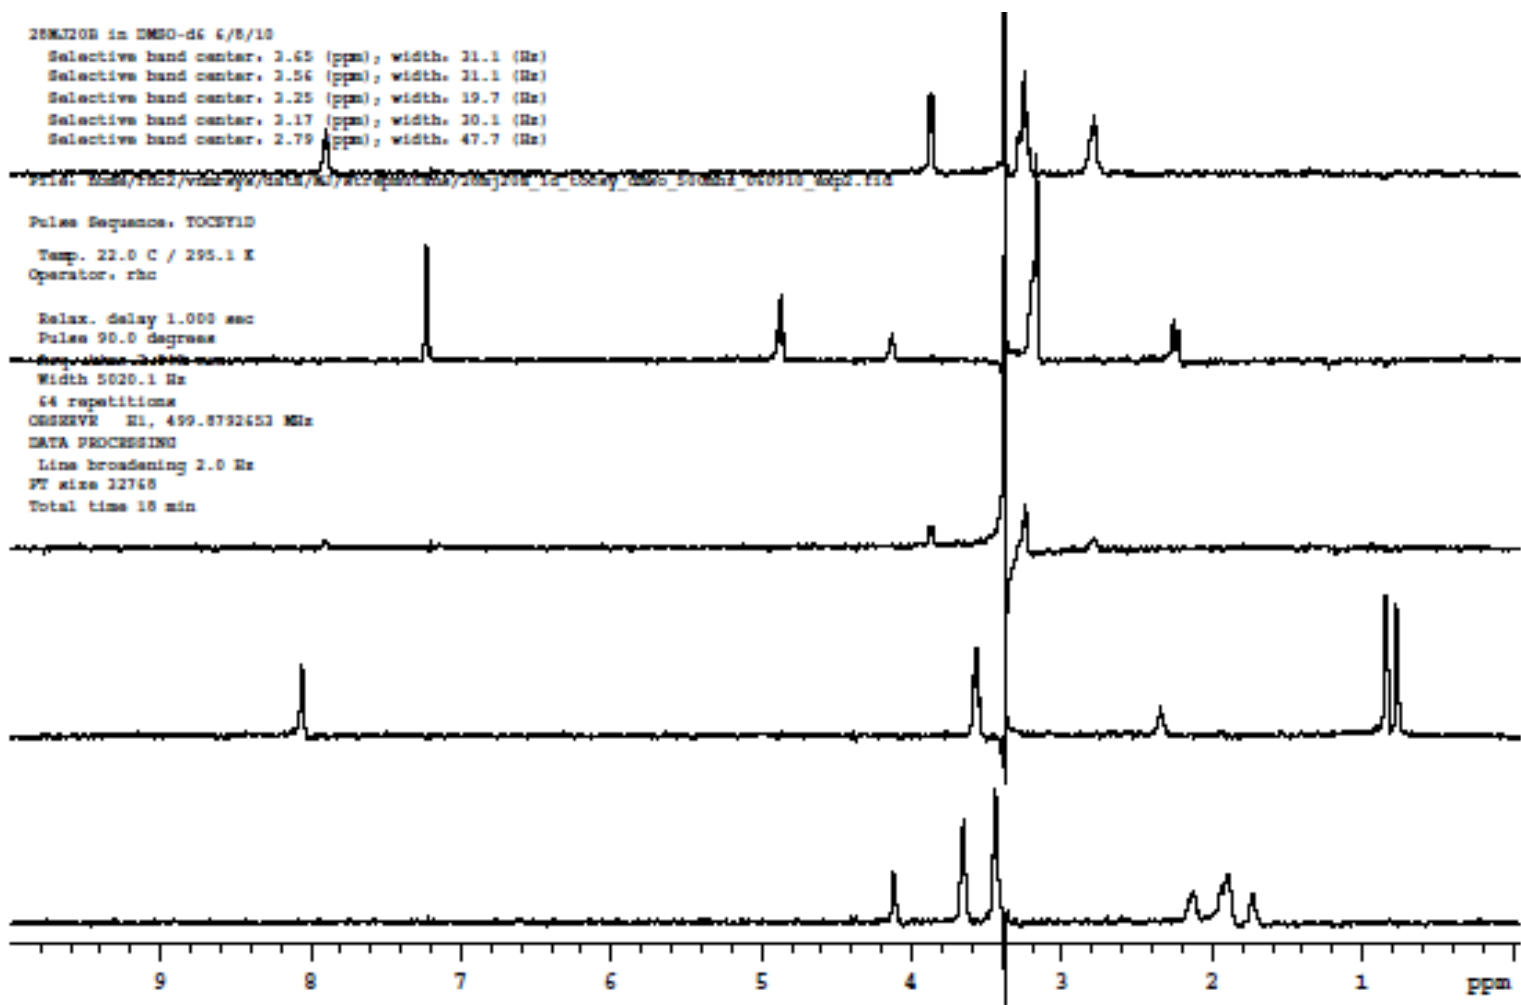

Fig. S10 1D  $^1\text{H}$ - $^1\text{H}$  TOCSY NMR spectra for mutanobactin A (**1**) (panel 2 of 3)

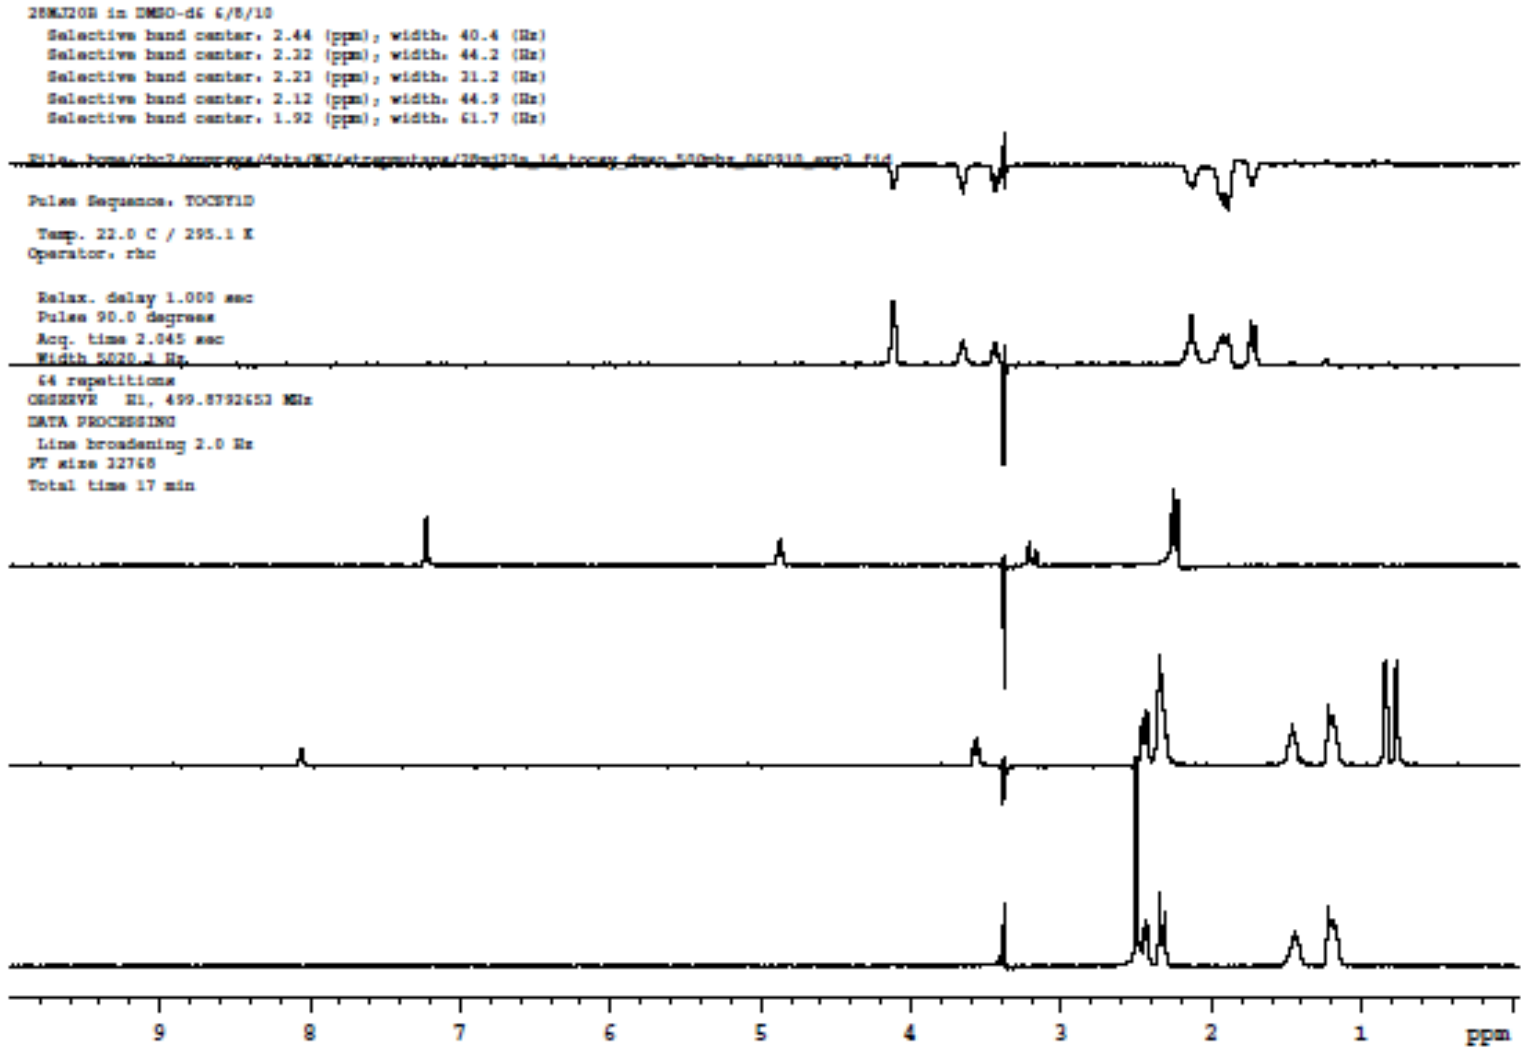

Fig. S10 1D  $^1\text{H}$ - $^1\text{H}$  TOCSY NMR spectra for mutanobactin A (**1**) (panel 3 of 3)
